# Supplementary material for: A Qualitative Study on the Process of the Mental Health Assessment and Intervention after the Sewol Ferry Disaster: Focusing on Survivors among Danwon High School Students
Source: PubMed Central journal article supplement — Soa Chongsonyon Chongsin Uihak. 2018 Oct 1;29(4):161–71. doi: 10.5765/jkacap.180013 (PMC7289463; doi:10.5765/jkacap.180013), 2018-10-01
Supplement: JKACAP-29-161_suppl.pdf [file JKACAP-29-161_suppl.pdf]

**Supplement Table 1.** Experiences of survivors during the first 2 weeks after Sewol Ferry Disaster (hyperacute phase) in the university hospital located in Ansan City

| 구 분              | 상위 범주                  | 하위 범주                                                                                                        | 인터뷰 내용                                                                                                                                                                                                                                                                                                                                                                                         |                                                                                                                                                                                                                                                                                                                                                                                                                                                                                                                                                                                           |
|------------------|------------------------|--------------------------------------------------------------------------------------------------------------|------------------------------------------------------------------------------------------------------------------------------------------------------------------------------------------------------------------------------------------------------------------------------------------------------------------------------------------------------------------------------------------------|-------------------------------------------------------------------------------------------------------------------------------------------------------------------------------------------------------------------------------------------------------------------------------------------------------------------------------------------------------------------------------------------------------------------------------------------------------------------------------------------------------------------------------------------------------------------------------------------|
| 평가               | 사건 인식의 어려움             | 현재 상황이 믿기지 않음                                                                                                | “이 일이 저한테 진짜 일어났다는 게 믿기지 않았어요”(학생 8)<br>“그 상황이 안 믿겨져서요. 병원에선 현실감도 없고 멍했거든요”(학생 9)<br>“그냥 시키니까 평가를 했던 것 같아요. 굳이 이걸 해야 되나 싶었어요”(학생 17)<br>“몇백 개 되는 문항은 누가 만들었는지 원망스러웠어요”(학생 4)<br>“설문지 양이 너무 많아서 하기 힘들었어요”(학생 6)<br>“설문지 체크하는 건 그냥 빨리 끝내야지 하는 생각이 더 컸어요”(학생 19)<br>“전 설문조사할 때 안 좋게 체크하지 않아요. 그러면 또 부를까 봐요”(학생 20)<br>“결과는 안 알려준 건지 기억을 못 하는 건지 모르겠어요”(학생 3)<br>“검사 결과에 대해서는 설명 들은 적은 없어요”(학생 21) |                                                                                                                                                                                                                                                                                                                                                                                                                                                                                                                                                                                           |
|                  |                        | 설문 실시에 대한 비자발성                                                                                               | 평가 실시에 대한 의문<br>설문지 분량이 많았음                                                                                                                                                                                                                                                                                                                                                                    | “타임 별로 항상 치료 프로그램 있으면 할 사람 오라고 했었는데요. 하기 싫은데 해야 됐어요. 친구들 보면 프로그램하러 올라가서 잤어요”(학생 1)<br>“병실에 있었는데, 프로그램하라고 하니깐요. 그런 거 하지 말라고 소리 지른 애들도 있었어요. 그 마음도 이해돼요”(학생 18)<br>“전 거의 침대에 누워서 버티고 참여 안 했어요”(학생 5)<br>“참여를 거의 안 했어요. 참여 안 할 때도 딱히 뭔가를 한 건 없었는데, 몸만 힘들어서 자고 그랬던 것 같아요”(학생 11)<br>“상담받을 친구는 받지만 그렇지 않은 친구는 그대로 뒀으면 하는 느낌이에요”(학생 15)<br>“엄청 예민했거든요. 엄마 아빠가 밥 먹는 것도 이때는 싫었어요. 그때는 누가 웃는 것만 봐도 싫었어요”(학생 18)                                                                                                                                                                                    |
|                  |                        | 설문지를 주의 깊게 체크하지 못함                                                                                           |                                                                                                                                                                                                                                                                                                                                                                                                | “그냥 왔다 갔다 했어요. 그런가 보다 하고, 오라면 오고 가라면 가고요”(학생 3)<br>“오라고 하면 가서 아무 생각 없이 있는 것 같아요”(학생 15)                                                                                                                                                                                                                                                                                                                                                                                                                                                                                                   |
|                  |                        | 심리검사 결과에 대한 흐릿한 기억                                                                                           |                                                                                                                                                                                                                                                                                                                                                                                                | “마음을 열기가 쉽지가 않아서 거부했던 것 같아요. 대답도 제대로 하지 않고 상담받는 게 힘들었어요”(학생 12)<br>“상담받으면서 ‘어떻게 하면 이 상담이 끝나지?’만 생각했어요’. ‘예, 아니오, 로만 대답할까?’ 이런 생각했었어요”(학생 1)<br>“집단 상담에서 모르는 사람들 앞에서 제 얘기를 해야 되니까 그게 꺼리지고 불편했어요”(학생 9)<br>“여러 명이 모여서 사건 얘기하는 것 자체가 별로였어요. 그 시기가 안 좋았던 것 같아요”(학생 17)<br>“왜 자꾸 그걸 물어보는지 도움 안 됐어요. 물어보는 자체를 잘 모르겠으니까요”(학생 4)<br>“병원에서는 말해달라고 했었어요. 그러니까 거부감이 들었고요, 그땐 다 싫었어요”(학생 12)                                                                                                                                                                                                          |
| 개입               | 프로그램 참여 거부             | 하기 싫은데 해야 함                                                                                                  | “사람들이 환자치럼 보는 것 같이 느낌<br>“맞지 않아도 되는 링거를 맞았음<br>개인 상담은 괜찮았음<br>프로그램보다 친구들과의 시간이 더 좋았음<br>병원에 있어서 좋은 점도 있었음<br>(학생 6)<br>“지금 애들한테도 물어보면 대학병원에 입원했을 때가 더 좋았다고 생각할걸요. 터치하는 사람 없고, 친구들이 먹을 거 사 오고, 친구들 보고, 가족들 보면서 그때가 더 좋았어요”(학생 19)                                                                                                                                                               |                                                                                                                                                                                                                                                                                                                                                                                                                                                                                                                                                                                           |
|                  |                        | 프로그램에 참여하지 않음                                                                                                |                                                                                                                                                                                                                                                                                                                                                                                                | “아이클레이 같은 거로 만들기 했었는데, 그건 재밌었어요”(학생 9)<br>“초반에는 미술치료했었어요. 만다라 색칠하는 거요”(학생 16)<br>“마술 쇼 봤어요. 다들 모여서 참여한 게 그게 처음이었어요”(학생 12)<br>“이상한, 신기한 마술 이런 것 보고요. 전 마술이 재밌었어요”(학생 18)<br>“뭔가 활동이 많긴 했어요. 만들기 같은 것도 있었고, 누가 오셔서 강의를 하시기도 했고요”(학생 11)<br>“애들끼리 안정 취하라고 프로그램들을 만드셨어요. 보드게임들도 있었어요”(학생 20)<br>“프로그램은 딱히 생각은 안 나요. 재미있었던 건 없었어요”(학생 7)                                                                                                                                                                                                                                                      |
|                  |                        | 그냥 놔두기를 바람                                                                                                   |                                                                                                                                                                                                                                                                                                                                                                                                | “혼자 하는 상담했었어요. 말하면서 우니까요. 그만큼 풀려지고요”(학생 19)<br>“오히려 프로그램 끝나고 저녁에 친구들이랑 만나서 얘기한 시간이 더 좋았어요”(학생 1)<br>“쉬는 휴게실 만들어주셔서 거기서 친구들이랑 얘기했어요”(학생 10)<br>“병원에 있는 게 좋긴 좋았어요. 병원에 있는 데 엄마 아빠 아는 사람들 오시면 용돈도 많이 주시고요. 저녁에 뭐 시켜 먹고 후배들 오면 뭐 사주고 그랬어요”(학생 6)<br>“지금 애들한테도 물어보면 대학병원에 입원했을 때가 더 좋았다고 생각할걸요. 터치하는 사람 없고, 친구들이 먹을 거 사 오고, 친구들 보고, 가족들 보면서 그때가 더 좋았어요”(학생 19)                                                                                                                                                                                                                                 |
|                  |                        | 비자발적, 비의식적 참여                                                                                                | 오라면 오고, 가라면 가고                                                                                                                                                                                                                                                                                                                                                                                 | “사람들이 저를 환자치럼 보는 것 같으니까 저도 제가 그 보이는 것 같았고요”(학생 1)<br>“처음에 환자 취급하나 싶어서 거부감이 들었어요”(학생 17)<br>“맞지 않아도 되는 링거를 맞고 있었다는 거예요. 그걸 엄청 싫어했고요. 그래서 도망가기도 했어요”(학생 19)<br>“1:1로 개별적으로 얘기했어요. 그때 현재 상황도 얘기하고요. 제가 하고 싶은 것들 얘기도 하고요”(학생 14)<br>“혼자 하는 상담했었어요. 말하면서 우니까요. 그만큼 풀려지고요”(학생 19)<br>“오히려 프로그램 끝나고 저녁에 친구들이랑 만나서 얘기한 시간이 더 좋았어요”(학생 1)<br>“쉬는 휴게실 만들어주셔서 거기서 친구들이랑 얘기했어요”(학생 10)<br>“병원에 있는 게 좋긴 좋았어요. 병원에 있는 데 엄마 아빠 아는 사람들 오시면 용돈도 많이 주시고요. 저녁에 뭐 시켜 먹고 후배들 오면 뭐 사주고 그랬어요”(학생 6)<br>“지금 애들한테도 물어보면 대학병원에 입원했을 때가 더 좋았다고 생각할걸요. 터치하는 사람 없고, 친구들이 먹을 거 사 오고, 친구들 보고, 가족들 보면서 그때가 더 좋았어요”(학생 19) |
| 환자에 대한 타인의 시선 의식 | 사람들이 환자치럼 보는 것 같이 느낌   | 맞지 않아도 되는 링거를 맞았음                                                                                            |                                                                                                                                                                                                                                                                                                                                                                                                |                                                                                                                                                                                                                                                                                                                                                                                                                                                                                                                                                                                           |
|                  |                        | 개인 상담이 도움 안 됨                                                                                                |                                                                                                                                                                                                                                                                                                                                                                                                |                                                                                                                                                                                                                                                                                                                                                                                                                                                                                                                                                                                           |
|                  |                        | 집단 상담은 싫었음                                                                                                   |                                                                                                                                                                                                                                                                                                                                                                                                |                                                                                                                                                                                                                                                                                                                                                                                                                                                                                                                                                                                           |
|                  |                        | 부족했던 마음의 준비 시간                                                                                               |                                                                                                                                                                                                                                                                                                                                                                                                |                                                                                                                                                                                                                                                                                                                                                                                                                                                                                                                                                                                           |
| 도움 되었던 긍정적인 면    | 프로그램보다 친구들과의 시간이 더 좋았음 | 병원에 있어서 좋은 점도 있었음                                                                                            |                                                                                                                                                                                                                                                                                                                                                                                                |                                                                                                                                                                                                                                                                                                                                                                                                                                                                                                                                                                                           |
|                  |                        | 프로그램 활동 경험                                                                                                   |                                                                                                                                                                                                                                                                                                                                                                                                |                                                                                                                                                                                                                                                                                                                                                                                                                                                                                                                                                                                           |
|                  |                        | 미술치료 프로그램에 참여함                                                                                               |                                                                                                                                                                                                                                                                                                                                                                                                |                                                                                                                                                                                                                                                                                                                                                                                                                                                                                                                                                                                           |
|                  |                        | 마술 공연 봄                                                                                                      |                                                                                                                                                                                                                                                                                                                                                                                                |                                                                                                                                                                                                                                                                                                                                                                                                                                                                                                                                                                                           |
| 허락되지 않은 외출, 면회   | 병원에서 외출, 면회가 안되어 답답함   | 여러 프로그램이 있었음                                                                                                 |                                                                                                                                                                                                                                                                                                                                                                                                |                                                                                                                                                                                                                                                                                                                                                                                                                                                                                                                                                                                           |
|                  |                        | 프로그램이 재미없었음                                                                                                  |                                                                                                                                                                                                                                                                                                                                                                                                |                                                                                                                                                                                                                                                                                                                                                                                                                                                                                                                                                                                           |
|                  |                        | 장례식장에 못 가게 해 납득이 안됨                                                                                          |                                                                                                                                                                                                                                                                                                                                                                                                |                                                                                                                                                                                                                                                                                                                                                                                                                                                                                                                                                                                           |
|                  |                        | 장례식장에 못 가게 해서 화가 났고요”(학생 4)<br>“지금 생각해보면 병원에서 외출을 차단하지 않았다면 전 장례식장에 갔을 것 같아요. 장례식은 참석하는 게 좋았겠다고 생각해요”(학생 18) |                                                                                                                                                                                                                                                                                                                                                                                                |                                                                                                                                                                                                                                                                                                                                                                                                                                                                                                                                                                                           |

**Supplement Table 2.** Experiences of survivors during the 3 week to 6 week (acute/subacute phase) in an training institute in Ansan City

| 구 분 | 장 소 | 상위 범주           | 하위 범주                                                        | 인터뷰 내용                                                                                                                                                                                                                                                                                                       |
|-----|-----|-----------------|--------------------------------------------------------------|--------------------------------------------------------------------------------------------------------------------------------------------------------------------------------------------------------------------------------------------------------------------------------------------------------------|
| 평가  | 연수원 | 심리검사 미 실시       | 검사는 안 한 것으로 기억함                                              | “검사는 별로 안 했던 것 같아요. 거의 없었어요”(학생 1)                                                                                                                                                                                                                                                                           |
| 개입  | 연수원 | ‘함께’라는 시너지 효과   | 친구들이랑 같이 있는 것 자체가 좋았음                                        | “친한 친구들이랑 같이 있을 수 있어서요. 이게 제일 좋은 기억으로 남아있어요. 친구들이랑 같이 있는 게 혼자 있는 것보다 나으니까요”(학생 8)<br>“일단은 같은 경험을 한 친구들이랑 계속 있으니까 그게 괜찮았어요”(학생 17)                                                                                                                                                                            |
|     |     |                 | 또래가 직접 프로그램을 기획함                                             | “선생님들이 짜 준 프로그램이나 상담보다는 그렇게 노는 게 더 좋았어요”(학생 9)<br>“저희가 직접 런닝맨 게임 프로그램을 기획해서 했는데 재밌었어요”(학생 19)                                                                                                                                                                                                                |
|     |     | 집단의 동질성         | 같은 한 집단이라는 게 느껴짐                                             | “배에서 이렇게 나오게 됐다는 얘기를 처음 하게 되면서 ‘친구들이 이런 생각을 하고 있었구나’. 알게 되면서 거리감이 좁혀졌어요. 같은 한 집단이라는 게 느껴졌어요. 자유롭게 얘기하고 힘들어하는 친구들 다독여주고 했던 게 좋았어요”(학생 1)                                                                                                                                                                      |
|     |     | 집단 놀이 활동의 긍정성   | 모두 증상을 가지고 있음을 알게 됨<br>놀면서 하나가 활동 같지 않았음                     | “본격적으로 저희가 치료받고 있다는 걸 느꼈어요. ‘우리가 아픈 애들이었구나’.를 이때 깨달았던 것 같아요”(학생 19)<br>“집단으로 놀면서 하나가 활동이란 생각은 안 들었어요. 친구들이랑 재밌게 했어요”(학생 2)<br>“중간중간에 전체가 같이하는 활동하는 건 운동회 같아서 재밌었어요”(학생 19)                                                                                                                                   |
|     |     | 새로운 환경 적응의 어려움  | 프로그램의 재 경험을 원함<br>활동적인 프로그램을 선호함<br>간식이 마음에 듦<br>상담 선생님이 좋았음 | “연수원 기억은 너무 좋았어요. 너무 편했고요, 또 가고 싶어요. 그때 프로그램 그대로 또 했으면 좋겠어요”(학생 11)<br>“메모지에 친구 장점 적어서 붙여놓고 하는 것도 재밌고 좋았어요. 밝은 내용에 대한 활동이 더 마음 편했어요”(학생 8)<br>“간식 주면 엄청 좋아해요. 중요한 건 먹을 거 같아요”(학생 2)<br>“상담 선생님이 계속 안 바뀌고 계셨거든요. 상담 선생님이 엄마 같은 느낌이었어요. 배려해주시고, 생각해주시는 게 느껴졌어요”(학생 1)<br>“선생님들은 진심을 담아서 해줬다고 해야 될까 그랬어요”(학생 8) |
|     |     |                 | 처음에는 적응이 안 됨<br><br>듣는 등 마는 등 함<br>왜 한 건지 모름                 | “처음에는 여러 활동들을 갑자기 해본 거라 적응 안 됐었어요”(학생 4)<br>“처음에는 답답했어요. 왜 거기서 살아야 되나 싶어서요”(학생 15)<br>“듣는 등 마는 등 했어요. 나쁜 건 아니었다는 느낌이 들어요. 그렇다고 해서 추가로 뭐가 더 필요하단 생각은 안 들고요”(학생 3)<br>“그걸 왜 한 건지 몰랐었어요. 지금 감정이 어떤지 딱히 생각 안 하는데 얘기하라니까 난감했어요”(학생 5)                                                                             |
|     |     | 다양한 프로그램의 참여    | 갑자기 하려니 힘들었음<br>친구들끼리 다투기도 함<br>프로그램이 많았음                    | “다 거부하고 감정적으로 싫어서요. 그걸 왜 하라고 했는지 모르겠어요. 친구들이랑 다 같이 안 한다고 말했어요”(학생 9)<br>“병원에서 한 달 가까이 있다가 하려고 보니까 단계가 필요했던 것 같아요. 풀어져 있다가 해야 된다고 하니까 힘들었어요”(학생 14)<br>“그때는 마음 맞는 친구들끼리 만난 게 아니라 갑자기 모르는 친구들끼리 만난 거라 트러블도 많이 생겼어요”(학생 20)<br>“조를 짜서 몇 가지 놀이 같은 것도 하고 그랬었어요. 학교 가는 것처럼 아침에 일어나서 다른 건물로 이동했어요”(학생 21)           |
|     |     |                 | 미술치료를 받음                                                     | “프로그램이 엄청 많았어요. 학교 선생님들 오셔서 학교처럼 수업도 받았고요”(학생 10)<br>“친구들이랑 찰흙 만들고 그랬어요. 그건 재미있었어요. 클레이 밖에 생각이 안 나요”(학생 6)<br>“만들거나 그리는 거 했어요”(학생 7)                                                                                                                                                                         |
|     |     | 프로그램의 부정적 인식    | 연극 활동을 경험함<br>멘토링 프로그램을 함                                    | “마지막에 각 반끼리 연극했거든요. 연기는 못했어도 재미있었어요. 처음에는 하기 싫어서 누워있었는데, 지금은 생각나고 또 하고도 싫어요”(학생 4)<br>“멘토링은 그때 만났던 선생님들이랑 지금까지 연락해요”(학생 7)                                                                                                                                                                                   |
|     |     |                 | 너무 치료라는 느낌이 들어서 거부함                                          | “대학생들 선생님들이 저희랑 나이대가 비슷하니까요. 그런 활동했던 게 더 기억에 남아요”(학생 9)<br>“치료받는 기분이 너무 심했어요”(학생 7)<br>“너희는 아프니까 치료를 받아야 된다는 느낌이 있었어요. 그런데 제가 볼 땐 아프지 않은 것 같은데 환자 취급을 하니까 그랬어요”(학생 14)                                                                                                                                       |
|     |     | 일상으로의 복귀 희망, 연습 | 집단 상담이 싫었음                                                   | “집단 내에서 얘기하게 하고, 싫으면 안 해도 되긴 하지만 분위기가 그렇게 조성이 안 되다 보니까요”(학생 7)                                                                                                                                                                                                                                               |
|     |     |                 | 프로그램이 지루했음                                                   | “단체로 하는 회복 프로그램 있었어요. 전 되게 하기 싫었어요”(학생 14)<br>“프로그램은 싫다기보다 지루한 느낌이었어요”(학생 1)<br>“그저 귀찮았어요”(학생 15)                                                                                                                                                                                                            |
|     |     | 대학 병원           | 일정이 너무 빡빡했음                                                  | “일정은 학교 수업처럼 빡빡했어요. 쉬는 시간도 없었거든요”(학생 1)<br>“일주일 동안 심리 검사, 치료라고 해야 되나. 짜여있는 스케줄대로 행동했어요”(학생 19)                                                                                                                                                                                                               |
|     |     |                 | 흥미 있는 활동을 원했음<br>일상생활로 돌아가고 싶음                               | “다 좋아할 만한 공통된 거 해주면 좋겠어요. 남자들은 축구공 하나만 던져줘도 축구를 하려고 하니까요. 앉아서만 하는 건 별로였고요”(학생 14)<br>“저희는 외부랑 단절된 거니까 궁금하기도 했고, 일상생활로 돌아가고 싶었어요”(학생 9)<br>“그때는 그냥 집에 가고 싶어서요”(학생 17)                                                                                                                                         |
|     |     | 내원하지 않음         | 일반 학교 수업을 받음                                                 | “연수원에 학교 선생님들 와서 수업도 들었어요”(학생 5)                                                                                                                                                                                                                                                                             |
|     |     |                 | 외출해서 통원치료 받음                                                 | “연수원에서 대학병원에서 일정 잡아줘서 통원치료 했었거든요. 거기 정신과 왔다 갔다 했었어요. 대부분 애들 다 그랬어요”(학생 5)<br>“연수원 안에서도 대학병원 가서 주기적으로 갔던 것 같아요”(학생 11)                                                                                                                                                                                        |
|     |     |                 | 안산 소재 대학병원에는 안 갔음                                            | “병원에는 안 갔었어요. 상담 자체를 싫어하고 너무 귀찮아서요”(학생 6)<br>“대학병원에 통원 치료하러 가진 않았어요”(학생 9)                                                                                                                                                                                                                                   |

**Supplement Table 3.** Experiences of survivors from the 7 week to the end of the eleventh-grade (subacute/chronic phase), returning to school

| 구 분                    | 장 소                                                         | 상위 범주                  | 하위 범주                                                                                  | 인터뷰 내용                                                                  |                                                                           |
|------------------------|-------------------------------------------------------------|------------------------|----------------------------------------------------------------------------------------|-------------------------------------------------------------------------|---------------------------------------------------------------------------|
| 평가                     | 교내 마음건강센터                                                   | 설문 실시에 대한 익숙함          | ‘매일 하는 거네’라고 느낌                                                                        | “병원에 입원했을 때랑 비슷한 설문지였고, 별다른 건 없어서 매일 하는 느낌이었어요”(학생 10)                  |                                                                           |
|                        |                                                             |                        | 설문지를 솔직하게 실시함                                                                          | “평가가 필요하다는 생각까진 모르겠지만 솔직하게 하긴 했죠. 그래도 성실히 했어요”(학생 1)                    |                                                                           |
|                        |                                                             |                        | 설문 문항들이 불편하진 않았음                                                                       | “설문지 보면서 불편하거나 그렇진 않았어요”(학생 5)                                          |                                                                           |
|                        |                                                             | 설문지 실시의 불편함            | 여전히 설문지는 하기 귀찮음                                                                        | “계속 봤던 질문들이라 익숙해서 그 일이 떠오르게 하지는 않았어요”(학생 7)                             |                                                                           |
|                        |                                                             |                        | 다양한 평가 실시                                                                              | 여러 검사를 한 것으로 기억함                                                        | “귀찮았던 것 밖에는 기억이 잘 안 나요”(학생 2)                                             |
|                        |                                                             |                        |                                                                                        |                                                                         | “집중하게 되지는 않았어요. 똑같다 보니 건성으로 하게 됐던 것 같아요”(학생 19)                           |
|                        |                                                             | 평가 결과에 대한 이해           | 평가 결과가 궁금함                                                                             | 평가 결과가 기억나지 않음                                                          | “스트레스 검사했었어요”(학생 10)                                                      |
|                        |                                                             |                        |                                                                                        | 평가 결과가 기억나지 않음                                                          | “호흡 훈련, 교감 지수, 부교감 지수 파악하는 검사했어요”(학생 16)                                  |
|                        |                                                             |                        |                                                                                        | 평가 결과가 기억나지 않음                                                          | “그림검사 같은 거 했었어요”(학생 19)                                                   |
|                        |                                                             |                        |                                                                                        | 평가 결과가 기억나지 않음                                                          | “결과가 어떤지 받아보고 싶었어요”(학생 3)                                                 |
| 대학 병원                  | 주기적 평가 시행                                                   | 주기적으로 평가를 하였음          | “검사 결과를 들었는지는 기억이 안 나요. 결과 중이는 받았던 것 같아요”(학생 17)                                       |                                                                         |                                                                           |
|                        |                                                             | 평가 결과에 관한 기억           | “갈 때마다 했어요. 질문도 똑같고 양도 같았어요. 반복되는 느낌이었어요”(학생 18)                                       |                                                                         |                                                                           |
|                        |                                                             | 평가 결과에 관한 기억           | “결과는 들은 기억이 잘 없어요”(학생 7)                                                               |                                                                         |                                                                           |
|                        |                                                             | 평가 결과에 관한 기억           | “검사 결과 듣고도 나를 알아봤다고 느끼기보다는 그냥 했나 보다 싶었어요. 했으니까 알려준다고 생각했어요”(학생 19)                     |                                                                         |                                                                           |
| 개입                     | 교내 마음건강센터                                                   | 상담자와의 라포 형성            | 상담하면서 힘든 거 다 얘기함                                                                       | “학교 들어가서 더 힘들었어요. 전 제일 친했던 친구들이 없어졌어요. 얘기하고 싶은 것들 다 얘기하면서 도움 됐어요”(학생 1) |                                                                           |
|                        |                                                             |                        | 진심으로 대해주시는 게 느껴짐                                                                       | “의사 대 환자가 아니라 사람 대 사람으로 대해주시는 게 느껴졌어요. 학교라서 그렇게 느꼈을 수도 있어요”(학생 7)       |                                                                           |
|                        |                                                             |                        | 상담 선생님을 편하게 느낌                                                                         | “제 마음을 너무 잘 아시는 것 같아서 그게 좋았어요. 보듬어 준다고 할까요”(학생 12)                      |                                                                           |
|                        |                                                             | 주기적인 상담 일정             | 선생님이 부르면 상담하러 감                                                                        | “선생님이랑 얘기할 땐 뭐가 마음이 편해져요”(학생 7)                                         |                                                                           |
|                        |                                                             |                        | 상담 선생님이 애들마다 정해져 있음                                                                    | “센터 선생님이 전 부르면 가는 편이에요”(학생 5)                                           |                                                                           |
|                        |                                                             |                        | 수업 시간에 상담하러 갈 수 있음                                                                     | “가서 얘기하고 상담받고 검사하고 그랬어요”(학생 9)                                          |                                                                           |
|                        |                                                             | 상담에 대한 긍정적인 인식         | 스스로 필요할 때 찾아가서 상담받음                                                                    | 상담 선생님이 애들마다 정해져 있음                                                     | “상담 선생님이 정해져 있어서요. 일주일에 한 번씩 가서 몇 교시에 선생님 만나기로 했다고 하면 가서 만나고 그랬어요”(학생 16) |
|                        |                                                             |                        |                                                                                        | 상담 선생님이 애들마다 정해져 있음                                                     | “수업 중간에 갈 수도 있거든요. 수업보단 가벼운 느낌이었죠”(학생 5)                                  |
|                        |                                                             |                        |                                                                                        | 상담 선생님이 애들마다 정해져 있음                                                     | “학교에서는 문자로 ‘몇 시에 오세요’ 하면 갔어요”(학생 3)                                       |
|                        |                                                             |                        |                                                                                        | 상담 선생님이 애들마다 정해져 있음                                                     | “상담이 필요할 때가 있어요. 그 시기가 되면 제가 찾아가서 상담받는 게 좋은 것 같아요”(학생 8)                  |
| 대학 병원                  | 부담 없는 상담                                                    | 상담 갖지 않게 자유로웠음         | “저희한테 개방적으로 자유롭게 프로그램 진행해주셔서 구속받는 느낌 안 들고 제한 없어서 좋았어요”(학생 2)                           |                                                                         |                                                                           |
|                        |                                                             | 1:1로 상담하는 게 좋았음        | “전 누구랑 진지한 얘기 할 때는 여러 명 보다 개인적으로 하는 게 좋았어요”(학생 7)                                      |                                                                         |                                                                           |
|                        |                                                             | 상담실이 가까워서 좋았음          | “상담은 주로 1:1로 스쿨닥터 선생님이랑 했어요”(학생 8)                                                     |                                                                         |                                                                           |
|                        |                                                             | 일상 얘기 나누는 게 좋았음        | “얘기를 털어놓을 곳이 없었는데 학교 스쿨닥터 선생님이랑 상담했었어요”(학생 8)                                          |                                                                         |                                                                           |
|                        |                                                             | 증상에 대해 설명 들음           | “학교 안에 있으니까 궁금한 거 생기면 바로 물어볼 수도 있었어요”(학생 7)                                            |                                                                         |                                                                           |
|                        |                                                             | 만들기 활동에 참여함            | “그냥 일상생활 이야기 나누고 그랬어요”(학생 9)                                                           |                                                                         |                                                                           |
|                        |                                                             | 강아지가 도움 되었음            | “제가 말을 꺼낼 수 있게 일상적인 얘기를 나누는 게 더 좋았어요”(학생 4)                                            |                                                                         |                                                                           |
|                        |                                                             | 상담 시간은 5~10분 내외임       | ““그 시기에는 다 이릴 수 있고 나만 그런 게 아니다”라는 것도 얘기해주시고, 일반 사람들과 같다는 걸 알게 해주셨어요”(학생 8)             |                                                                         |                                                                           |
|                        |                                                             | 학교에서 일찍 나와서 병원 갈 수 있었음 | “저울에는 트리 만들고, 꽃꽂이도 해서 애들 하나씩 나눠줬어요”(학생 4)                                              |                                                                         |                                                                           |
|                        |                                                             | 기타                     | 프로그램 참여                                                                                | 상담 시간을 5~10분 내외임                                                        | “수업 쉬는 시간에 강아지 보러 갔는데요. 센터에 동물이 있었던 게 도움이 됐던 것 같아요”(학생 16)                |
| 학교에서 일찍 나와서 병원 갈 수 있었음 | “상담 시간은 5~10분 정도로 얼마 안 걸렸어요. 시간은 부담 없었고, 학교 끝나고 갔었어요”(학생 3) |                        |                                                                                        |                                                                         |                                                                           |
| 지원 끊기기 전까지는 다님         | “학교에서 일찍 나와서 병원 가고 그랬고요”(학생 17)                             |                        |                                                                                        |                                                                         |                                                                           |
| 의사 선생님이 오라고 하셨음        | “대학병원 가는 건 출석도 되니까요”(학생 6)                                  |                        |                                                                                        |                                                                         |                                                                           |
| 얘기를 들어주신 것이 도움 됨       | “병원은 꾸준히 갔었는데. 지원 끝나서 안 갔던 것 같아요”(학생 6)                     |                        |                                                                                        |                                                                         |                                                                           |
| 상담에 대한 아쉬움             | “병원은 지원 끊기고 나서는 안 갔죠”(학생 13)                                |                        |                                                                                        |                                                                         |                                                                           |
| 별로 느껴진 소득은 없었음         | “의사 선생님이랑 상담 그런 것만 했어요. 그냥 오라고 해서 갔었어요”(학생 5)               |                        |                                                                                        |                                                                         |                                                                           |
| 약물 처방을 위한 진료           | “대학병원에는 한 달에 한 번 오라 해서 갔어요”(학생 3)                           |                        |                                                                                        |                                                                         |                                                                           |
| 별로 느껴진 소득은 없었음         | “사고 얘기가 아니라 제 개인적인 얘기를 해주니까 도움이 됐어요”(학생 4)                  |                        |                                                                                        |                                                                         |                                                                           |
| 약물 처방을 위한 진료           | “면담하는 게 부담은 없었어요”(학생 9)                                     |                        |                                                                                        |                                                                         |                                                                           |
| 기타                     | 프로그램 참여                                                     | 상담 선생님이 따라 다르게 느낌      | “선생님 한 분이 꾸준히 계셨다면 좋았을 텐데, 전 선생님이 따라서 다르게 느꼈어요”(학생 8)                                  |                                                                         |                                                                           |
|                        |                                                             | 별로 느껴진 소득은 없었음         | “병원 선생님이 중간에 바뀌셨어요”(학생 17)                                                             |                                                                         |                                                                           |
|                        |                                                             | 약물 처방을 위한 진료           | “일상 물어보고 괜찮은지 물어보고 똑같은 거 물어보니까요. 도움받을까 없었어요. 별로 소득은 없었어요”(학생 3)                        |                                                                         |                                                                           |
|                        |                                                             | 병원에는 몇 번 정도만 내원함       | “도움받은 건 별로 없었고요”(학생 6)                                                                 |                                                                         |                                                                           |
|                        |                                                             | 멘토링 프로그램에 참여함          | “상담하고 약 받아왔어요. 약은 엄마가 주니까 ‘약이다’ 하고 먹긴 했어요”(학생 21)                                      |                                                                         |                                                                           |
|                        |                                                             | 멘토링 프로그램에 참여함          | “저한테는 ‘약을 받으러 가야지’. 하는 마음이었지, ‘상담하러 가야지’ 하는 마음은 아니었어요”(학생 12)                          |                                                                         |                                                                           |
| 기타                     | 프로그램 참여                                                     | 멘토링 프로그램에 참여함          | “대학병원은 잠이 안 와서 두세 번 갔던 것 같아요”(학생 3)                                                    |                                                                         |                                                                           |
|                        |                                                             | 멘토링 프로그램에 참여함          | “병원은 초반에 다니다가 전 괜찮은 것 같아서 그냥 필요할 때 가겠다고 했어요”(학생 7)                                     |                                                                         |                                                                           |
|                        |                                                             | 멘토링 프로그램에 참여함          | “학교 들어와서도 멘토링은 조금 더 했었어요”(학생 5)                                                        |                                                                         |                                                                           |
|                        |                                                             | 멘토링 프로그램에 참여함          | “다른 대학교에서 공부로 멘토링 하러 오신 분도 계셨고, 취미 활동으로 오신 분도 있었어요”(학생 10)                             |                                                                         |                                                                           |
|                        |                                                             | 멘토링 프로그램에 참여함          | “다 같이 연극배우하고 대본도 있고, 직접 무대에서 연출해보고 조명도 해보고 그랬어요”(학생 10)                                |                                                                         |                                                                           |
|                        |                                                             | 멘토링 프로그램에 참여함          | “처음에는 애들이 좀 안 내켜 하고 시킨 등 했었는데, 마지막에 동화 각색해서 직접 스토리를 써서 했거든요. 그땐 다 웃으면서 참여했어요”(학생 16)   |                                                                         |                                                                           |
| 기타                     | 프로그램 참여                                                     | 멘토링 프로그램에 참여함          | “프로그램 짜서 방학 때 놀러 갔다 오는 거 하거나 학교 와서 만들기 프로그램 참여한 적 있어요”(학생 5)                           |                                                                         |                                                                           |
|                        |                                                             | 멘토링 프로그램에 참여함          | “학교로 와서는 열심히 공부하려고 했어요”(학생 11)                                                         |                                                                         |                                                                           |
|                        |                                                             | 멘토링 프로그램에 참여함          | “공부는 할 만했어요”(학생 15)                                                                    |                                                                         |                                                                           |
|                        |                                                             | 멘토링 프로그램에 참여함          | “죽은 친구들 반에 가서 편지 써서 교탁 앞에서 태운 적이 있었는데요. 학교 복귀한지 얼마 되지 않아서 했던 거예요. 싫은 기억은 아니었어요”(학생 14) |                                                                         |                                                                           |
| 기타                     | 프로그램 참여                                                     | 멘토링 프로그램에 참여함          | “죽은 친구들 반에 가서 편지 써서 교탁 앞에서 태운 적이 있었는데요. 학교 복귀한지 얼마 되지 않아서 했던 거예요. 싫은 기억은 아니었어요”(학생 14) |                                                                         |                                                                           |
|                        |                                                             | 멘토링 프로그램에 참여함          | “존치 교실을 가고 싶을 때마다 갔거든요. 전 그게 좋았어요. 자주 갈 수 있었으니까요. 혼자 생각도 하고 친구들 생각도 할 수 있었어요”(학생 18)   |                                                                         |                                                                           |

**Supplement Table 4.** Experiences of survivors during the Twelfth-grade year (chronic phase), continuing intervention programs in and out of school

| 구 분 | 장 소       | 상위 범주         | 하위 범주                | 인터뷰 내용                                                                                                                                                                                                                                                                                                                                                                                                                                                                                                                                                                                                                                                          |                                                                                                                                                                                                                                                                                                                                                                                                                                       |
|-----|-----------|---------------|----------------------|-----------------------------------------------------------------------------------------------------------------------------------------------------------------------------------------------------------------------------------------------------------------------------------------------------------------------------------------------------------------------------------------------------------------------------------------------------------------------------------------------------------------------------------------------------------------------------------------------------------------------------------------------------------------|---------------------------------------------------------------------------------------------------------------------------------------------------------------------------------------------------------------------------------------------------------------------------------------------------------------------------------------------------------------------------------------------------------------------------------------|
| 평가  | 교내 마음건강센터 | 평가에 대한 인식 개선  | 2학년 때와 비슷함           | “2학년 때와 거의 비슷한 패턴이었어요. 계속 학교 다니면서 설문지는 했어요.”(학생 19)                                                                                                                                                                                                                                                                                                                                                                                                                                                                                                                                                                                                             |                                                                                                                                                                                                                                                                                                                                                                                                                                       |
|     |           |               | 처음보다는 낫다고 생각함        | “매번 하던 거니까 처음보다는 낫다 싶었어요”(학생 1)<br>“문항 수가 작아서 할 만했어요”(학생 21)<br>“스트레스 검사도 해주셨어요”(학생 18)                                                                                                                                                                                                                                                                                                                                                                                                                                                                                                                                                                         |                                                                                                                                                                                                                                                                                                                                                                                                                                       |
| 개입  | 대학 병원     | 평가 시행의 어려움    | 스트레스 검사를 실시함         | “설문지를 할 때 좋고 나쁜 그런 기억은 없는데요, 할 땐 힘들었어요”(학생 3)                                                                                                                                                                                                                                                                                                                                                                                                                                                                                                                                                                                                                   |                                                                                                                                                                                                                                                                                                                                                                                                                                       |
|     |           |               | 평가 시행의 어려움           | “대학병원에서도 설문지 해서 받아 갔어요”(학생 2)                                                                                                                                                                                                                                                                                                                                                                                                                                                                                                                                                                                                                                   |                                                                                                                                                                                                                                                                                                                                                                                                                                       |
|     | 교내 마음건강센터 | 상담 유지         | 설문 검사를 시행함           | “선생님 만나는 애들은 똑같이 만나서 얘기했어요”(학생 10)<br>“학교에 있을 때 스쿨닥터 선생님이랑 주기적으로 만났어요”(학생 11)<br>“스쿨닥터 선생님이 고등학교 졸업 때까지 있어 주신 건 필요했던 것 같아요. 언제든지 제가 갈 수 있었다는 게 저한테는 도움이 많이 됐어요”(학생 1)                                                                                                                                                                                                                                                                                                                                                                                                                                                                                           |                                                                                                                                                                                                                                                                                                                                                                                                                                       |
|     |           |               | 상담 유지                | “2학년 때와 거의 비슷함”                                                                                                                                                                                                                                                                                                                                                                                                                                                                                                                                                                                                                                                 |                                                                                                                                                                                                                                                                                                                                                                                                                                       |
|     |           | 상담 횟수의 감소     | 2학년 때보다는 가는 횟수가 줄어들  | “가는 횟수만 좀 줄고요. 가끔 가서 똑같이 하고 그랬어요”(학생 5)<br>“2학년 땐 뭘가 많았던 것 같은데, 3학년 때는 좀 덜 했었죠”(학생 9)<br>“집단 프로그램 같은 건 거의 없었고요. 각 담당 선생님이 있어서 개인적으로 상담받는 정도였어요”(학생 1)                                                                                                                                                                                                                                                                                                                                                                                                                                                                                                           |                                                                                                                                                                                                                                                                                                                                                                                                                                       |
|     |           |               | 필요한 정보 및 활동 제공       | “스쿨닥터 선생님이 약에 대해서 설명해주셨어요. 약을 복용하는 애들도 있어서요”(학생 19)<br>“대학교랑 과 선택하는 진로에 대해 얘기 많이 했어요. 고민도 같이하고요”(학생 11)<br>“꽃다발 만들기 이런 것도 하고, 그게 진짜 재밌었어요”(학생 12)<br>“상담 자체가 싫어니까 선생님이 부르면 싫다고 했던 친구들이 있었죠”(학생 1)<br>“향초 같은 것도 만들었는데, 괜찮았어요”(학생 8)<br>“방향제 만들기도 좋았어요”(학생 12)<br>“화장해주고 가르쳐주는 프로그램은 서로 친구들이랑 화장해주기도 했어요”(학생 12)<br>“힘들거나 대학 진로에 대해서 상담하고 싶은 때는, 온마음센터에서 대학교 자소서 쓸 때 도움 됐어요”(학생 19)<br>“병원은 계속 다녔고요. 제가 뭘 하려고 하면 집중을 잘 못했었거든요”(학생 6)<br>“대학병원은 3학년 때까지 다녔어요. 수업 마지막 시간에 병원 가는 편이었어요”(학생 15)<br>“대학병원 선생님들도 좋았어요. 유쾌하시고 센스도 좋으시고, 이미지가 포근했어요”(학생 2)<br>“불면증도 있고, 우울증, 불안이 있어서 병원에 꾸준히 갔었는데 선생님을 오래 뵈게 돼서 편했어요. 병원 선생님이랑 마음 열려서 잘 다녔어요”(학생 12)                      |                                                                                                                                                                                                                                                                                                                                                                                                                                       |
|     |           | 상담 거부         | 상담 자체를 싫어한 친구들이 있음   | “상담 자체가 싫어니까 선생님이 부르면 싫다고 했던 친구들이 있었죠”(학생 1)                                                                                                                                                                                                                                                                                                                                                                                                                                                                                                                                                                                                                    |                                                                                                                                                                                                                                                                                                                                                                                                                                       |
|     |           |               | 다양한 프로그램 경험          | “향초 같은 것도 만들었는데, 괜찮았어요”(학생 8)<br>“방향제 만들기도 좋았어요”(학생 12)<br>“화장해주고 가르쳐주는 프로그램은 서로 친구들이랑 화장해주기도 했어요”(학생 12)<br>“힘들거나 대학 진로에 대해서 상담하고 싶은 때는, 온마음센터에서 대학교 자소서 쓸 때 도움 됐어요”(학생 19)<br>“병원은 계속 다녔고요. 제가 뭘 하려고 하면 집중을 잘 못했었거든요”(학생 6)<br>“대학병원은 3학년 때까지 다녔어요. 수업 마지막 시간에 병원 가는 편이었어요”(학생 15)<br>“대학병원 선생님들도 좋았어요. 유쾌하시고 센스도 좋으시고, 이미지가 포근했어요”(학생 2)<br>“불면증도 있고, 우울증, 불안이 있어서 병원에 꾸준히 갔었는데 선생님을 오래 뵈게 돼서 편했어요. 병원 선생님이랑 마음 열려서 잘 다녔어요”(학생 12)                                                                                                                                                                                                                           |                                                                                                                                                                                                                                                                                                                                                                                                                                       |
|     |           | 온마음센터         | 다양한 프로그램 경험          | 향초 만들기를 함                                                                                                                                                                                                                                                                                                                                                                                                                                                                                                                                                                                                                                                       | “향초 같은 것도 만들었는데, 괜찮았어요”(학생 8)<br>“방향제 만들기도 좋았어요”(학생 12)<br>“화장해주고 가르쳐주는 프로그램은 서로 친구들이랑 화장해주기도 했어요”(학생 12)<br>“힘들거나 대학 진로에 대해서 상담하고 싶은 때는, 온마음센터에서 대학교 자소서 쓸 때 도움 됐어요”(학생 19)<br>“병원은 계속 다녔고요. 제가 뭘 하려고 하면 집중을 잘 못했었거든요”(학생 6)<br>“대학병원은 3학년 때까지 다녔어요. 수업 마지막 시간에 병원 가는 편이었어요”(학생 15)<br>“대학병원 선생님들도 좋았어요. 유쾌하시고 센스도 좋으시고, 이미지가 포근했어요”(학생 2)<br>“불면증도 있고, 우울증, 불안이 있어서 병원에 꾸준히 갔었는데 선생님을 오래 뵈게 돼서 편했어요. 병원 선생님이랑 마음 열려서 잘 다녔어요”(학생 12) |
|     |           |               |                      | 메이크업 알려주는 교육이 있었음                                                                                                                                                                                                                                                                                                                                                                                                                                                                                                                                                                                                                                               | “메이크업 알려주는 교육이 있었음”                                                                                                                                                                                                                                                                                                                                                                                                                   |
|     | 대학 병원     | 규칙적인 통원 치료    | 자기소개서 쓸 때 도움을 받음     | “자기소개서 쓸 때 도움을 받음”                                                                                                                                                                                                                                                                                                                                                                                                                                                                                                                                                                                                                                              |                                                                                                                                                                                                                                                                                                                                                                                                                                       |
|     |           |               | 병원엔 꾸준히 다님           | “병원엔 꾸준히 다님”                                                                                                                                                                                                                                                                                                                                                                                                                                                                                                                                                                                                                                                    |                                                                                                                                                                                                                                                                                                                                                                                                                                       |
| 기타  |           | 치료 종결         | 치료를 종결해도 되겠다는 얘기를 들음 | “3학년 말에는 안 와도 된다고 하시고, 괜찮은 것 같다고 하셔서 안 갔어요”(학생 4)<br>“병원에서 여러 치료들을 받아보도록 권유하신 적도 있었는데 제가 안 했어요. 하기 싫었어요”(학생 18)<br>“병원은 거의 안 갔고요. 따로 특별한 것도 없었어요”(학생 10)<br>“대학병원은 3학년까지는 갔던 것 같은데 지원이 끊겨서 안 갔어요”(학생 19)                                                                                                                                                                                                                                                                                                                                                                                                                                                        |                                                                                                                                                                                                                                                                                                                                                                                                                                       |
|     |           |               | 심층 치료 거부             | “심층 치료를 권유받은 적 있으나 거절함”                                                                                                                                                                                                                                                                                                                                                                                                                                                                                                                                                                                                                                         |                                                                                                                                                                                                                                                                                                                                                                                                                                       |
|     |           | 통원치료하지 않음     | 병원은 거의 간 적 없음        | “병원은 거의 안 갔고요. 따로 특별한 것도 없었어요”(학생 10)<br>“대학병원은 3학년까지는 갔던 것 같은데 지원이 끊겨서 안 갔어요”(학생 19)                                                                                                                                                                                                                                                                                                                                                                                                                                                                                                                                                                           |                                                                                                                                                                                                                                                                                                                                                                                                                                       |
|     |           |               | 지원이 끊겨서 가지 않음        | “대학병원은 3학년까지는 갔던 것 같은데 지원이 끊겨서 안 갔어요”(학생 19)                                                                                                                                                                                                                                                                                                                                                                                                                                                                                                                                                                                                                    |                                                                                                                                                                                                                                                                                                                                                                                                                                       |
|     |           | 학업 수행의 어려움    | 공부하려고 마음먹어도 잘 되지 않았음 | “대학을 가야 하니까 공부를 해야겠다고 마음먹어도 잘 안됐어요. 사건 전에는 공부 열심히 한다고 했었는데, 마음잡기가 안 되더라고요”(학생 1)<br>“사고 1주기 되기 일주일 전부터 엄청 우울했었어요. 정말 안 좋은 생각도 많이 들고 행사 때 엄청 울었어요. 그때는 치료가 필요했나 생각이 들었던 것 같아요”(학생 9)<br>“저희의 1주기 목표가 학생들끼리만 하는 거였거든요. 선생님들 간섭 없이 저희끼리만 하는 게 목표였고. 순수하게 추모를 하자는 의도였어요”(학생 20)<br>“진학에 대해서는 과를 어디 가야 할지 고민이 많긴 했어요”(학생 20)<br>“입시 스트레스를 그렇게 받지는 않았지만 준비 많이 했어요”(학생 10)<br>“대학교에서 입시 감독관분들 오셔서 면접 대비를 위해 질문하는 것도 있었어요”(학생 10)<br>“진로 결정을 잘 못했을 시기에 컨설팅 같은 걸 받았어요”(학생 10)<br>“진로 상담이나 유명한 분들 오셔서 강연 같은 건 좋았어요”(학생 15)<br>“특례 입학이어서 많이 싸웠었어요. 저는 적당히 잘 지원해서 다행히 대학교 잘 입학했어요”(학생 18)<br>“사람들한테 받은 게 충분히 많아서 더 필요한 건 없었던 것 같아요. 시민들도 많이 챙겨주시고, 너무 많아서 생각이 다 안 나요”(학생 4) |                                                                                                                                                                                                                                                                                                                                                                                                                                       |
|     |           |               | 사건 후의 1주기            | “사건 후 1주기 때 힘들었음”                                                                                                                                                                                                                                                                                                                                                                                                                                                                                                                                                                                                                                               |                                                                                                                                                                                                                                                                                                                                                                                                                                       |
|     |           | 대학고 입시를 위한 노력 | 입시를 준비함              | “입시를 준비함”                                                                                                                                                                                                                                                                                                                                                                                                                                                                                                                                                                                                                                                       |                                                                                                                                                                                                                                                                                                                                                                                                                                       |
|     |           |               | 모의 면접 연습함            | “모의 면접 연습함”                                                                                                                                                                                                                                                                                                                                                                                                                                                                                                                                                                                                                                                     |                                                                                                                                                                                                                                                                                                                                                                                                                                       |
|     |           |               | 진로 강의 들음             | 진로 강의 들음                                                                                                                                                                                                                                                                                                                                                                                                                                                                                                                                                                                                                                                        | “진로 강의를 잘 못했을 시기에 컨설팅 같은 걸 받았어요”(학생 10)<br>“진로 상담이나 유명한 분들 오셔서 강연 같은 건 좋았어요”(학생 15)<br>“특례 입학이어서 많이 싸웠었어요. 저는 적당히 잘 지원해서 다행히 대학교 잘 입학했어요”(학생 18)<br>“사람들한테 받은 게 충분히 많아서 더 필요한 건 없었던 것 같아요. 시민들도 많이 챙겨주시고, 너무 많아서 생각이 다 안 나요”(학생 4)                                                                                                                                                                                                    |
|     |           |               |                      | 특례 입학에 대한 다짐                                                                                                                                                                                                                                                                                                                                                                                                                                                                                                                                                                                                                                                    | “특례 입학이어서 많이 싸웠었어요. 저는 적당히 잘 지원해서 다행히 대학교 잘 입학했어요”(학생 18)                                                                                                                                                                                                                                                                                                                                                                             |
|     |           | 도움에 대한 감사     | 주변 분들이 많이 도와주심       | “사람들한테 받은 게 충분히 많아서 더 필요한 건 없었던 것 같아요. 시민들도 많이 챙겨주시고, 너무 많아서 생각이 다 안 나요”(학생 4)                                                                                                                                                                                                                                                                                                                                                                                                                                                                                                                                                                                  |                                                                                                                                                                                                                                                                                                                                                                                                                                       |

**Supplement Table 5.** Experiences of survivors after university entrance (10 months starting from the 22nd post-disaster month)

| 구 분             | 장 소                 | 상위 범주                                        | 하위 범주                                                                                                                                                                                                                      | 인터뷰 내용                                                                                                                                                                                                                                                                                                              |                                                                                                                                                            |
|-----------------|---------------------|----------------------------------------------|----------------------------------------------------------------------------------------------------------------------------------------------------------------------------------------------------------------------------|---------------------------------------------------------------------------------------------------------------------------------------------------------------------------------------------------------------------------------------------------------------------------------------------------------------------|------------------------------------------------------------------------------------------------------------------------------------------------------------|
| 평가              | 마음건강센터<br>(마음토닥 의원) | 지속적인 평가 실시                                   | 한 번 정도 한 적 있음<br>6개월에 한 번씩 평가 함                                                                                                                                                                                            | “대학교 1학년 때 검사 한 번 했어요”(학생 3)<br>“6개월에 한 번씩 검사지 하고 있어요. 다른 기관에서 하는 건 없어요”(학생 8)<br>“꾸준히 하고 있어요”(학생 16)                                                                                                                                                                                                               |                                                                                                                                                            |
| 개입              | 온마음센터               | 평가의 자발성 증가                                   | 심리 검사 있으면 받으려고 함                                                                                                                                                                                                           | “작년에 너무 힘들어서 심리 검사 있으면 받으려고 해요”(학생 2)                                                                                                                                                                                                                                                                               |                                                                                                                                                            |
|                 |                     | 평가 미 실시                                      | 평가하는 건 없음                                                                                                                                                                                                                  | “온마음센터는 검사하는 건 없어요. 그냥 선생님이랑 뭐 하고 지내는지 얘기하는 거예요”(학생 5)                                                                                                                                                                                                                                                              |                                                                                                                                                            |
|                 | 마음건강센터<br>(마음토닥 의원) | 꾸준한 상담 경험                                    | 스쿨닥터 선생님이랑 종종 만남                                                                                                                                                                                                           | “스쿨닥터 선생님이랑은 대학교 1학기 때는 한 달에 한 번 정도였어요. 여름 방학 때는 1주일에 한 번씩, 2학기 되니까 바빠서 잘 못 뵈었어요”(학생 1)<br>“마음토닥 의원은 계속 다니고 있어요. 신경받았는데 재검받으라고 해서요. 병원을 좀 더 다니고 오라는 데요. 불안하고 그런 게 좀 있어서요”(학생 15)                                                                                                                                    |                                                                                                                                                            |
|                 |                     |                                              | 학기 중에는 가끔씩 내원함                                                                                                                                                                                                             | “학기 중에는 두 달에 한 번 정도 왔어요. 제가 바빠서 못 와서 약도 엄마가 와서 받아 가기도 했어요. 과제가 엄청 많아서 정말 바빠요”(학생 12)                                                                                                                                                                                                                                |                                                                                                                                                            |
|                 |                     |                                              | 재정적 지원이 되는 것 같음                                                                                                                                                                                                            | “여기는 구세군이라고 거기서 의료비 지원을 해줘요. 영수증을 찍어서 주면 구세군에서 해주세요. 국가에서 해주는 건 지원 끊겼어요”(학생 12)                                                                                                                                                                                                                                     |                                                                                                                                                            |
|                 | 온마음센터               | 증상에 대한 염려                                    | 대학교 들어가면서부터 증상이 심해짐                                                                                                                                                                                                        | “제가 좀 이상한 케이스 같아요. 전 대학교 입학하고부터 더욱 힘들다고 느껴져요”(학생 11)<br>“대학교 들어가서 불안한 게 심해진 것 같아요”(학생 15)                                                                                                                                                                                                                           |                                                                                                                                                            |
|                 |                     |                                              | 여행에 대한 긍정적인 기억                                                                                                                                                                                                             | 기차 여행을 하였음<br>온천 여행 다녀옴                                                                                                                                                                                                                                                                                             | “기차 여행 갔었어요. 어딘지는 기억 안 나고요. 부모님도 같이 가고 싶으신 분들은 가고요”(학생 5)<br>“저번에 다 같이 온천 갔었거든요”(학생 4)<br>“온천 가는 프로그램은 참여해서 갔었어요. 그때 가서 선생님들이랑 얘기도 하고 조금 친해졌어요”(학생 7)      |
|                 |                     |                                              | 상담자와의 만남                                                                                                                                                                                                                   | 부산으로 배낭 여행 다녀옴<br>봉사하는 여행 프로그램 참여                                                                                                                                                                                                                                                                                   | “10명 정도 모여서 배낭여행 가는 거 다녀왔어요. 국내 여행으로 부산에 갔었던 거요. 힘들긴 했는데 재밌었어요”(학생 8)<br>“방학 때 봉사로 여행 가는 프로그램 참여하고서, 그 후로도 괜찮은 것 같으면 갔었어요”(학생 1)                           |
|                 |                     |                                              |                                                                                                                                                                                                                            | 센터 선생님이랑 만나서 밥 먹고 편하게 얘기함                                                                                                                                                                                                                                                                                           | “선생님을 만나긴 했는데 상담이라기보다 밥 먹고 편하게 얘기하듯이 했어요. 개인 상담 식으로 센터에서 만나기도 하고, 근처에 카페에 가기도 하고요”(학생 1)<br>“온마음센터 선생님이랑은 대학교 가서 잘 지내는지 근황 나누는 정도로 뵈고 같이 맛있는 것도 먹고요”(학생 8) |
|                 | 구세군                 | 센터와는 교류하지 않음                                 | 졸업 이후 연락 온 선생님이랑 만남                                                                                                                                                                                                        | “온마음센터 선생님은 연락해서 찾아오시면 만나는 정도였어요”(학생 9)<br>“졸업하고서 온마음센터에서 연락 온 선생님이데요. 저희 집 근처까지 오셔서 커피 마시고 그랬어요. 죄송한 마음에 이젠 제가 찾아가기도 해요”(학생 2)                                                                                                                                                                                     |                                                                                                                                                            |
| 이곳 아니면 갈 데가 없었음 |                     |                                              | “집에만 있으니 더 우울해져서 멘탈 무너졌을 때 가죠. 아니면 갈 데가 없으니까요. 원래 만나던 선생님이 있는데 그분 만나러 가는 거예요”(학생 2)                                                                                                                                        |                                                                                                                                                                                                                                                                                                                     |                                                                                                                                                            |
| 튜터링 프로그램        |                     | 센터와는 교류하지 않음                                 | 가끔 센터에서 연락이 왔으나 가지 않음                                                                                                                                                                                                      | “제가 연락도 안 받고요. 제가 하는 게 많아서 연락을 안 받다 보니까요. 다른 이유는 없었는데요”(학생 7)<br>“매번 문자가 오는데 그러면 대답만 해요. 따로 만나거나 그렇진 않고요”(학생 15)                                                                                                                                                                                                    |                                                                                                                                                            |
|                 |                     | 튜터링 프로그램                                     | 대학생 튜터링 프로그램에 참여함                                                                                                                                                                                                          | “튜터링 하는데요. 대학생이나 대학원생 만나서 공부하고 같이 목표 정해서 공동 프로젝트 하는 건데요. 등산을 하거나 운동을 하거나 악기를 배울 수도 있고요. 인간 대 인간으로 좋은 사람 만난 것 같아서 좋았어요”(학생 9)<br>“튜터링 괜찮았어요. 과목 중에 하나를 부족한 걸 정해서 공부하는 거예요”(학생 16)                                                                                                                                    |                                                                                                                                                            |
|                 |                     | 공동 참여 활동                                     | 맛 집 탐방을 함<br>공동 프로젝트를 하였음                                                                                                                                                                                                  | “구세군이라고, 맛집 탐방하고 학교 내에서 공부도 하고 놀러 갔던 활동 있었어요. 저는 그게 좋았어요”(학생 4)<br>“공동 프로젝트라고 해서 예산 안에서 정해서 하는 게 있는데요. 저는 그림 그리는 거 좋아해서, 도구를 사서 애니메이션 만들었어요”(학생 16)                                                                                                                                                                 |                                                                                                                                                            |
|                 |                     | 향후 참여 여부                                     | 다음 시기에는 신청하지 않음 예정임                                                                                                                                                                                                        | “공동체 활동도 방학 때 있었어요. 처음에는 자전거 타기를 한강에서 하는 걸 했는데, 이번에는 등산도 가봤어요”(학생 19)<br>“여행은 가족끼리 갔다 온 적 있는데요. 워터파크 같은데도 가고 좋았어요”(학생 12)<br>“가족 여행도 다녀왔어요. 전 부산으로 갔다 왔는데 아주 좋았어요”(학생 20)                                                                                                                                           |                                                                                                                                                            |
| 기타              | 직업 체험을 하였음          | 직업 체험을 하였음                                   | “직업 체험이라고 해서, 마을에 있는 영화관이나 보건소, 의료, 카페 등 자기 과에 맞는 장소를 연결해서 체험이나 아르바이트도 할 수 있었어요”(학생 12)                                                                                                                                    |                                                                                                                                                                                                                                                                                                                     |                                                                                                                                                            |
|                 |                     | 향후 참여 여부                                     | 다음 시기에는 신청하지 않음 예정임                                                                                                                                                                                                        | “저는 튜터링 안 하고 싶었고, 그때는 뭔가 불필요하다고 생각했었어요”(학생 7)<br>“튜터링 신청 안 했어요. 필요 없는 것 같아서요”(학생 8)                                                                                                                                                                                                                                 |                                                                                                                                                            |
|                 | 꾸준한 통원 치료           | 튜터링은 꾸준히 할 계획임                               | “계속하기로 했어요. 선생님이 저한테 잘 맞춰 주시고 좋았어요”(학생 18)<br>“전 올해도 다시 하려고요. 실력은 더 좋아지는 거 같아요. 왜냐하면 1:1 과외니까요”(학생 20)                                                                                                                     |                                                                                                                                                                                                                                                                                                                     |                                                                                                                                                            |
|                 |                     | 정신과 약 복용<br>치료비에 대한 부담<br>책임감, 독립심           | 정말 힘들 때 약을 복용함<br>대학병원은 비용이 많이 발생함<br>‘내가 알아서 해야지’ 하고 느낌                                                                                                                                                                   | “대학병원은 지금도 다니고 있어요. 저는 병원에 입원했을 때부터 안 끊기고 계속 다녀오고 있거든요. 병원 다니면서 힘들거나 불편한 건 없어요”(학생 16)<br>“지금은 약 안 먹어서 정말 힘들 때만 약 남은 거 조금씩 먹고 그런 편이에요”(학생 18)<br>“병원은 지원이 끊겨서 너무 비싸가지고 못 갔어요. 진료량 약 받는 것도 비싸서 돈이 안 되어서 못 갔어요”(학생 12)<br>“고등학교 때는 ‘우리끼리만~’ 이런 게 있었는데, 졸업하고서 헤어지니까 ‘내가 알아서 해야지’ 하는 게 생겼어요. 이제 제가 알아서 찾아서 해야겠죠”(학생 12) |                                                                                                                                                            |
| 대학 생활 경험        | 입학 후 적응의 어려움        | 그동안 많은 걸 지원받음                                | “저희가 계속 지원 같은 걸 많이 받고 있잖아요. 애들이 지원을 너무 받고 있다는 걸 당연하게 생각하거든요. 익숙해지는 건 안 좋은 것 같아요”(학생 20)                                                                                                                                    |                                                                                                                                                                                                                                                                                                                     |                                                                                                                                                            |
|                 |                     | 입학 후 적응의 어려움                                 | 처음 입학했을 때 힘들었음                                                                                                                                                                                                             | “대학교 입학했을 때는 힘들었어요. 고등학교 어디냐고 물어봐서요. 누가 물어보면 ‘어떻게 말하지?’ 난감한 정도예요”(학생 3)<br>“졸업하고서 친구들이 다 흩어져서 불편했어요. 예상대로 좀 힘들었어요”(학생 11)                                                                                                                                                                                           |                                                                                                                                                            |
|                 |                     | 대학 생활에 익숙해짐                                  | 처음에 걱정했으나 지금은 좋음                                                                                                                                                                                                           | “전 거의 대학교도 안 가고 집에만 박혀있고, 요즘엔 몸이 피곤해서 잠이 많아요. 대학교는 2학기 돼서는 거의 안 나갔어요. 아예 안 가서 애들이 자퇴한 줄 알아요”(학생 2)<br>“제가 학사경고 대상자예요. 시험을 안 본 것도 있고, 출석이 모자랐던 것도 있었어요. 지금은 좀 걱정이예요. 학교 1년 휴학하려고 생각 중이에요”(학생 11)<br>“대학교 2학기에는 학사경고를 받았어요”(학생 14)                                                                                    |                                                                                                                                                            |
|                 | 대학 생활에 익숙해짐         | 단원고 출신인 건 조심스러움                              | “제가 단원고 출신인 건 친한 친구 한두 명밖에 몰라요. 그거에 대해선 아직 조심스러워요. 학교 수업 중에 세월호 얘기도 많이 나오는데, 그럴 때는 그냥 조용히 있어요. 마음이 좀 무거워지니까요. 조심스럽고 신경 쓰일 때 있어요”(학생 20)                                                                                    |                                                                                                                                                                                                                                                                                                                     |                                                                                                                                                            |
|                 |                     | 대학 생활에 익숙해짐                                  | 처음에 걱정했으나 지금은 좋음                                                                                                                                                                                                           | “대학교 적응하는 거는 많이 걱정했었어요. 새로운 사람들 만나는 것도 무섭고 그랬는데요. 제가 생각했던 것보다 인간적으로 좋은 사람들이 많이 모여 있어서 1년 동안 너무 즐거웠어요. 학교 활동도 재밌었고요”(학생 14)<br>“대학교 적응하는 건 처음에 힘들까 봐 오리엔테이션도 안 갔었어요. 걱정 많이 했던 거랑 달리 친구도 잘 사귀고요. 단원고 나왔다고 하면 이해를 못 해줄까 봐 걱정했는데, 이해 잘 해줘서 잘 지내고 있어요”(학생 18)<br>“그냥 1년이 지나간 것 같아요. 진짜 빠르게 지나갔어요”(학생 17)                 |                                                                                                                                                            |
| 대학 생활 경험        | 그냥 1년이 빠르게 지나갔음     | 한 학기 지나니까 적응이 됨<br>과제가 많아서 바쁨<br>함께 무리 지어 다님 | “대학교 적응하기가 힘들었는데, 2학기 돼서는 적응을 하게 돼서 괜찮았던 것 같아요”(학생 13)<br>“밤샘이 많고 과제가 많아요. 과제 하는 것만 해도 일주일이 꼭 차거든요. 그렇게 해도 못 할 때도 있어요”(학생 13)<br>“학교 끝나면 새로 사귀 친구들이랑 매일 무리 지어 놀러 다녔어요. 대학 생활이 재미있어요. 고등학교에 비해 학교 규모도 크고, 책도 멋있더라고요”(학생 21) |                                                                                                                                                                                                                                                                                                                     |                                                                                                                                                            |
